# Supplementary material
Source: publisher figshare collection journal article supplement (https://acs.figshare.com/ndownloader/files/4488208)
Supplement: Supplementary file 1 [file 4488208]

**Synthesis and crystal structure of 2'-Se-modified guanosine containing DNA**

*Jozef Salon, Jia Sheng, Jianhuan Gan, Zhen Huang\**

Department of Chemistry, Georgia State University, Atlanta, GA 30303

***Supporting Information***

\*Corresponding author:  
Tel: (404) 413-5535  
Fax: (404) 413-5505  
E-mail: [huang@gsu.edu](mailto:huang@gsu.edu)

## Table of contents

|                                                                                                                       |       |
|-----------------------------------------------------------------------------------------------------------------------|-------|
| General Experimental Methods.....                                                                                     | 3     |
| Copies of $^1\text{H}$ NMR spectra of <b>2-7</b> .....                                                                | 4-9   |
| Copies of $^{13}\text{C}$ NMR (APT) spectra of <b>2-7</b> .....                                                       | 10-13 |
| A copy of $^{31}\text{P}$ NMR spectrum of <b>7</b> .....                                                              | 14    |
| Copies of ESI-TOF high-acc MS spectra of <b>4-7</b> .....                                                             | 15-16 |
| Data collection and refinement statistics of the 2'-SeMe-modified DNA<br>(dGTG <sub>Se</sub> TACAC) in Table S1 ..... | 17    |

## General Experimental Methods

$^1\text{H}$ ,  $^{13}\text{C}$ , and  $^{31}\text{P}$  NMR spectra were recorded on a 400 (400 MHz  $^1\text{H}$  NMR, 100 MHz  $^{13}\text{C}$  NMR) MHz spectrometer. The chemical shifts are reported relative to TMS.  $^1\text{H}$  and  $^{13}\text{C}$  peak assignments are based on similar compounds reported in the literature and APT experiments. Analytical thin-layer chromatography (TLC) was performed on silica 60F-254 plates. Flash column chromatography was carried out on silica gel 60 (70-230 mesh). All reactions were carried out under an argon atmosphere. The starting material 9- $[\beta\text{-D-Arabino-furanosyl}]$ guanine was purchased from *MetkinenOy*, Finland. Chemical reagents and solvents were purchased from commercial sources and were used without further purification with the exception of dimethoxytrityl chloride (DMTr-Cl), which was crystallized from hexanes.

**Figure S1.**  $^1\text{H}$  NMR spectrum of compound **2** in  $\text{DMSO}-d_6$

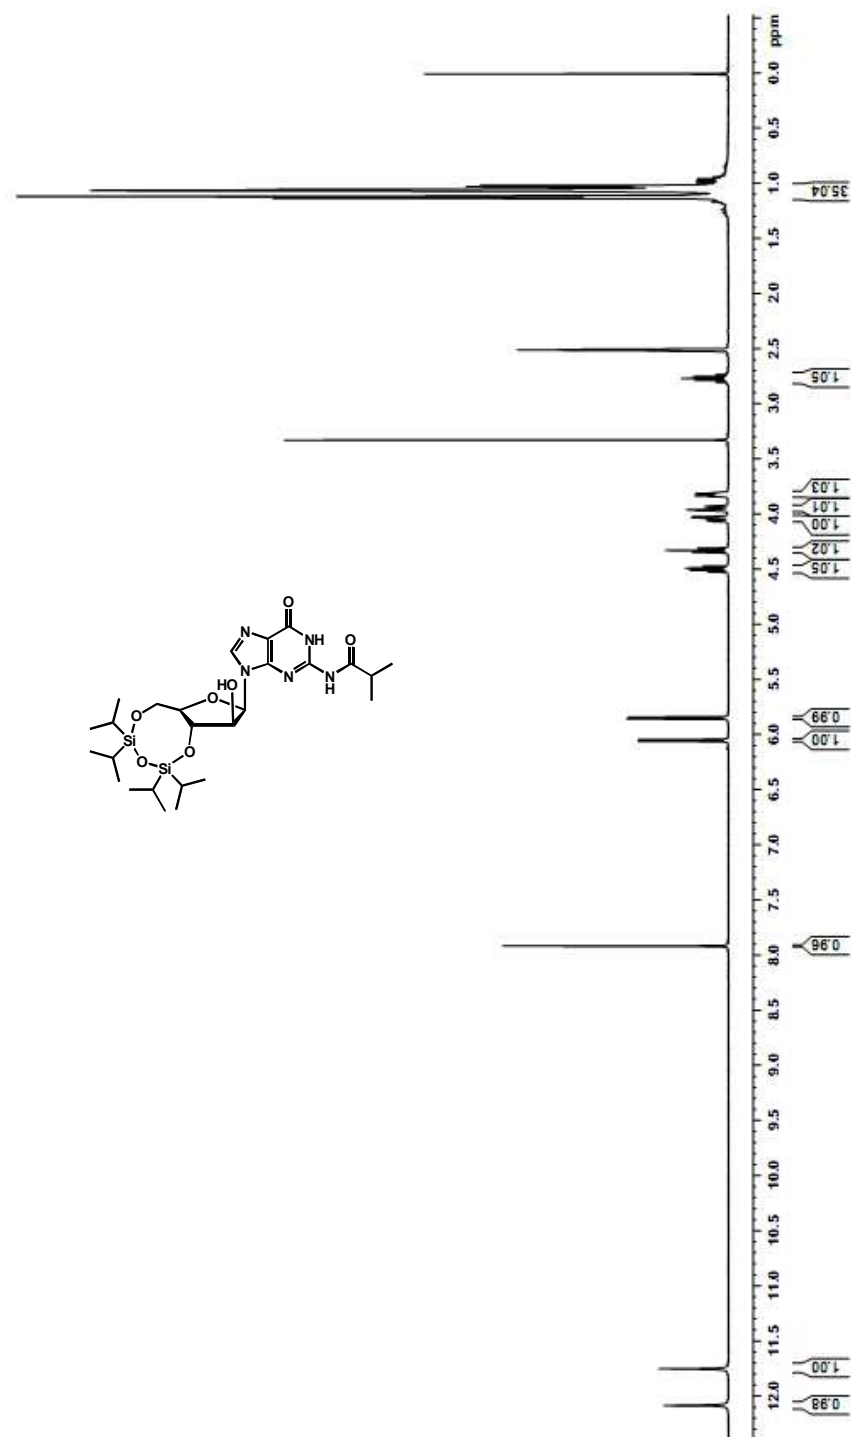

**Figure S2.**  $^1\text{H}$  NMR spectrum of compound **3** in  $\text{DMSO}-d_6$

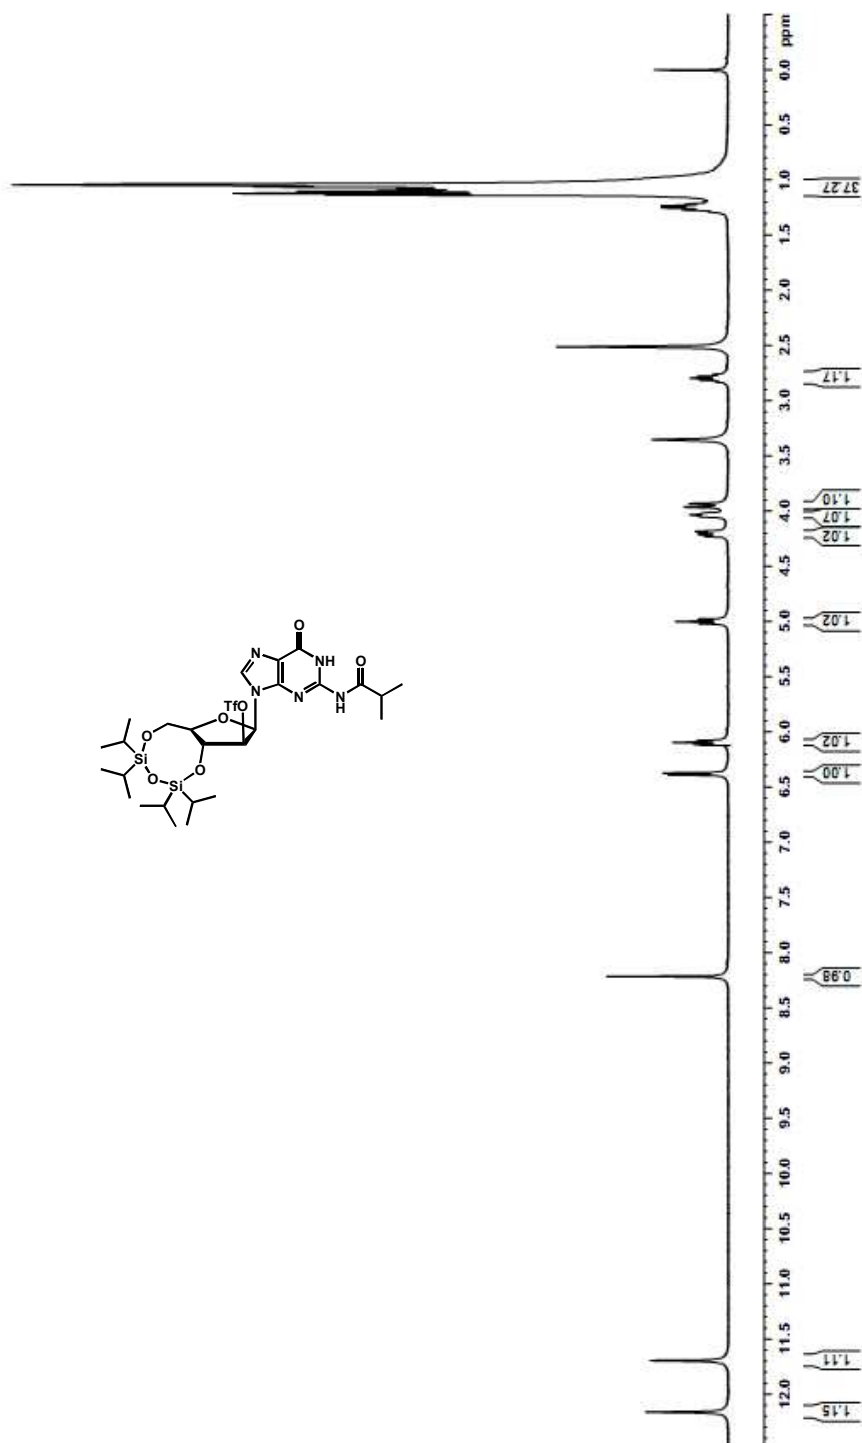

**Figure S3.**  $^1\text{H}$  NMR spectrum of compound **4** in  $\text{CDCl}_3$ 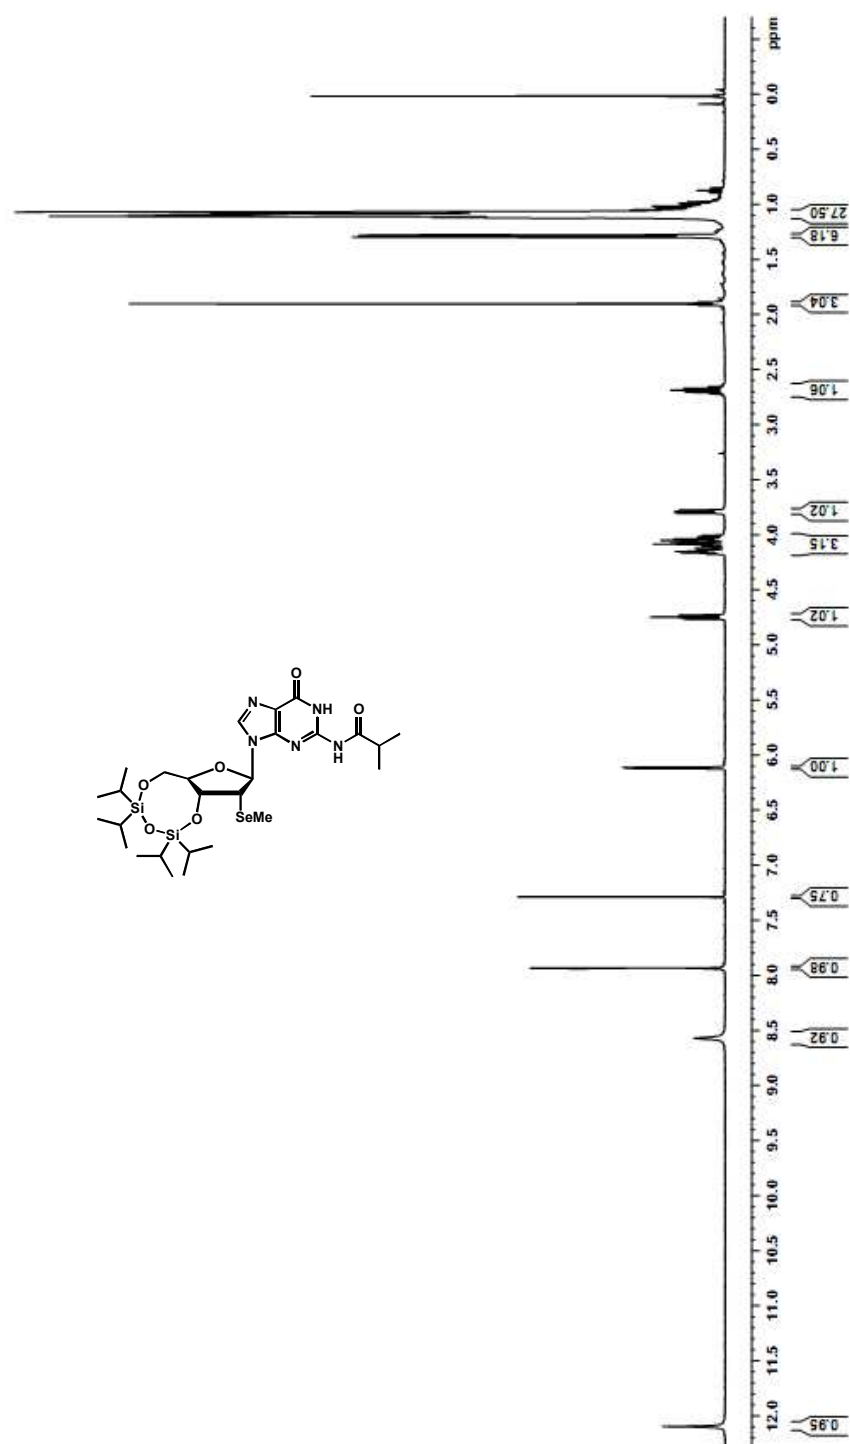

**Figure S4.**  $^1\text{H}$  NMR spectrum of compound **5** in  $\text{DMSO}-d_6$

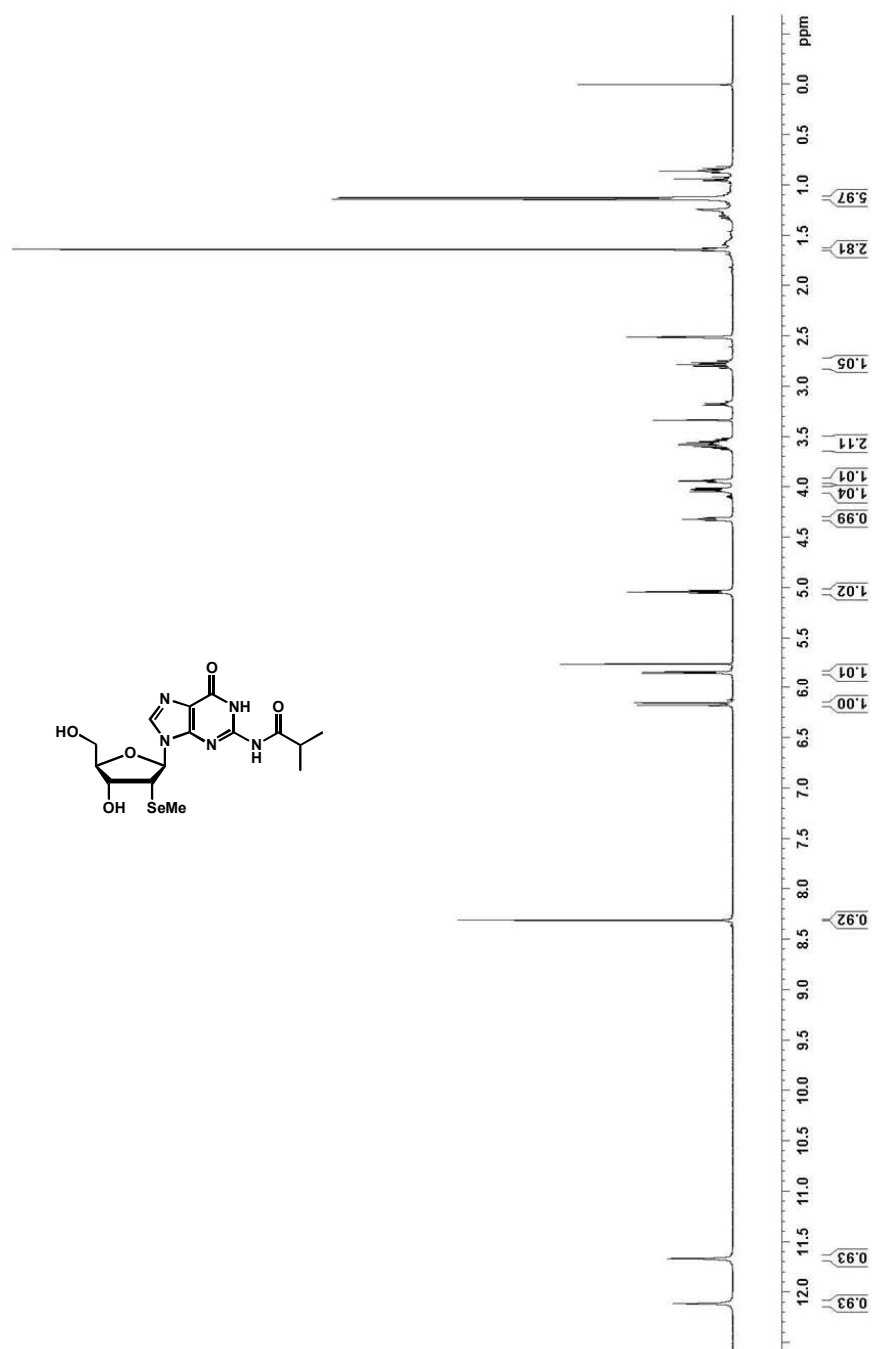

**Figure S5.**  $^1\text{H}$  NMR spectrum of compound **6** in  $\text{DMSO}-d_6$

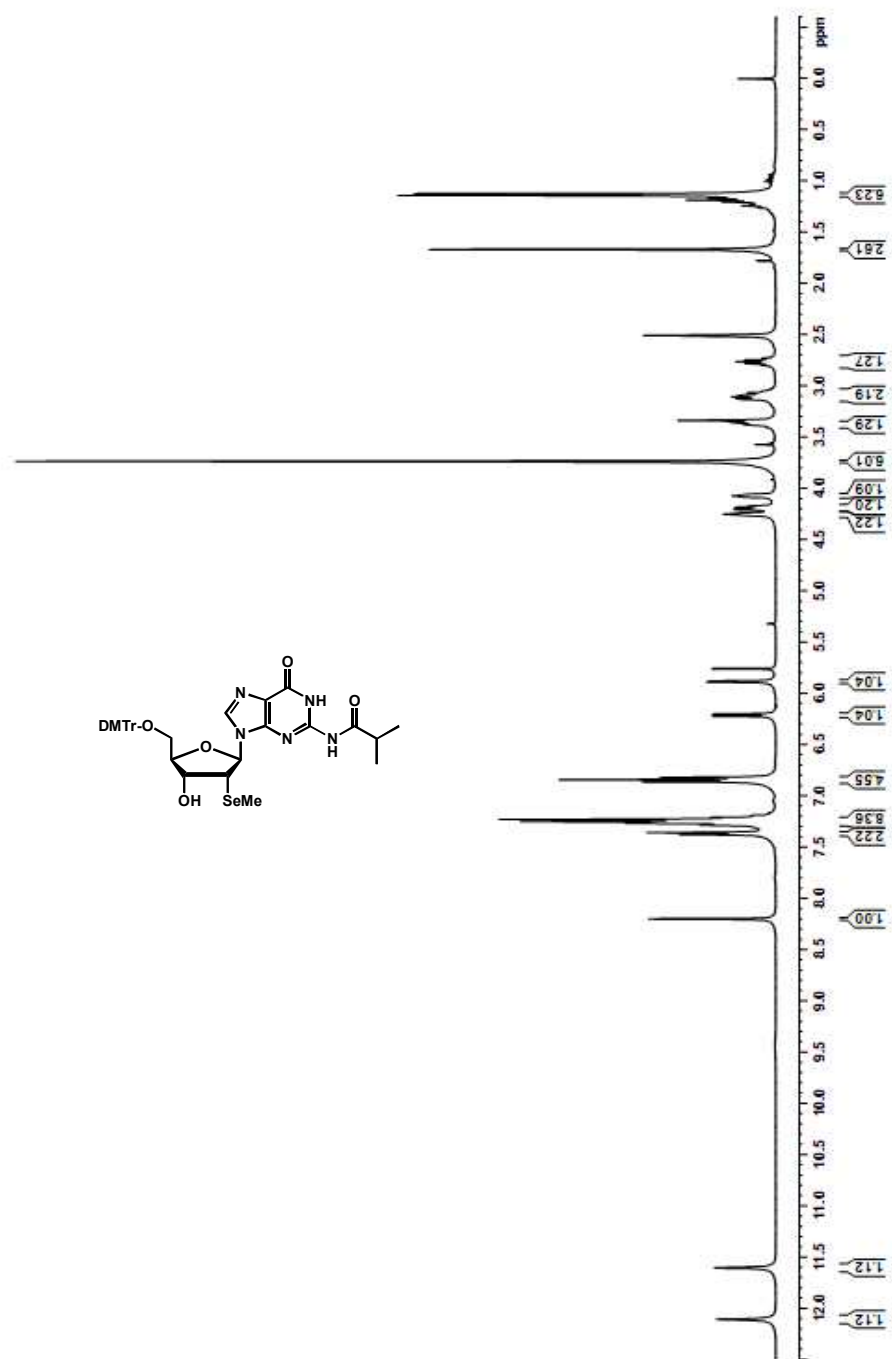



**Figure S6.**  $^1\text{H}$  NMR spectrum of compound **7** in  $\text{CDCl}_3$ 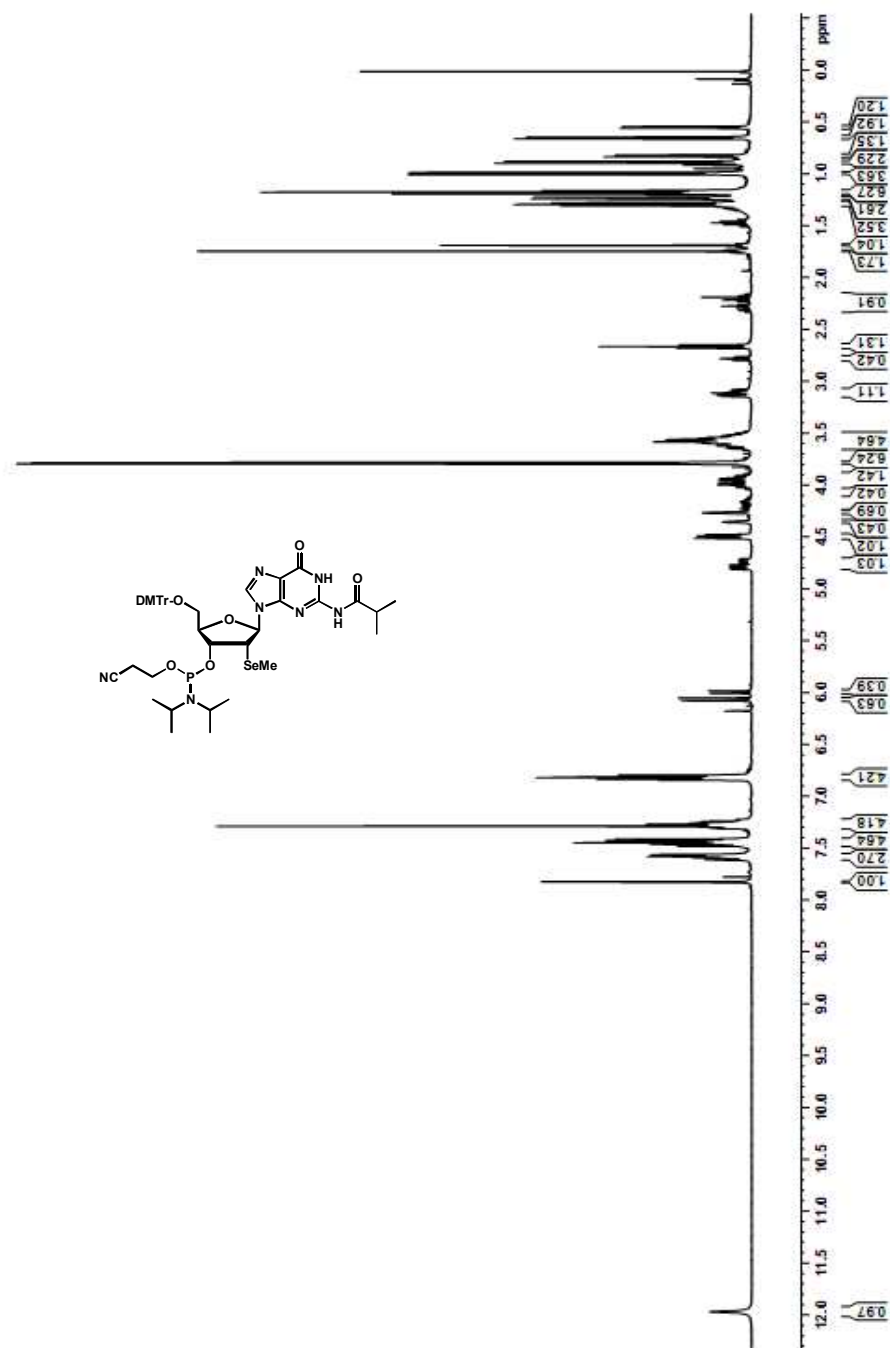

**Figure S7.**  $^{13}\text{C}$  NMR (APT) spectrum of compound **4** in  $\text{CDCl}_3$

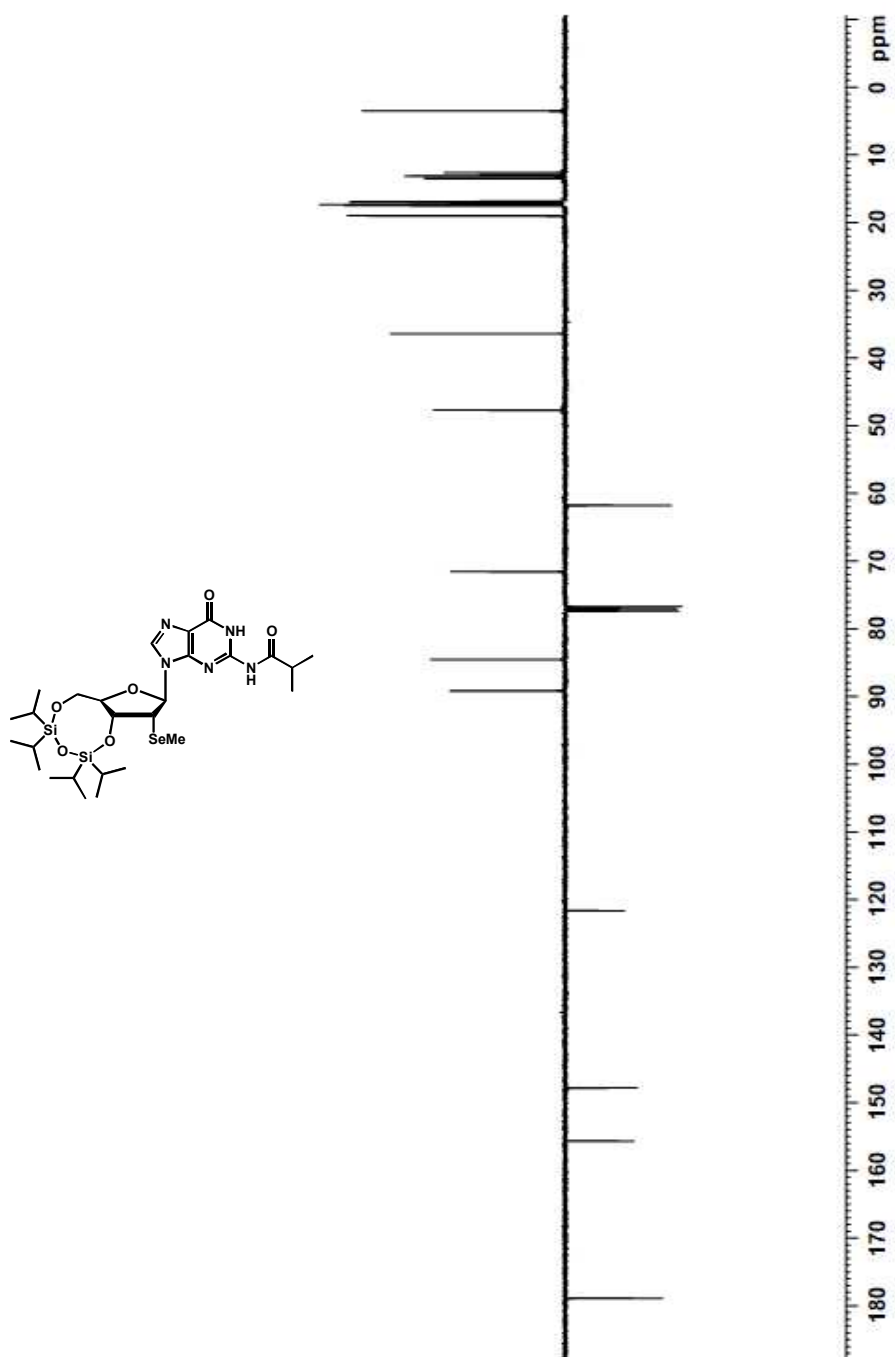

**Figure S8.**  $^{13}\text{C}$  NMR (APT) spectrum of compound **5** in  $\text{DMSO-}d_6$

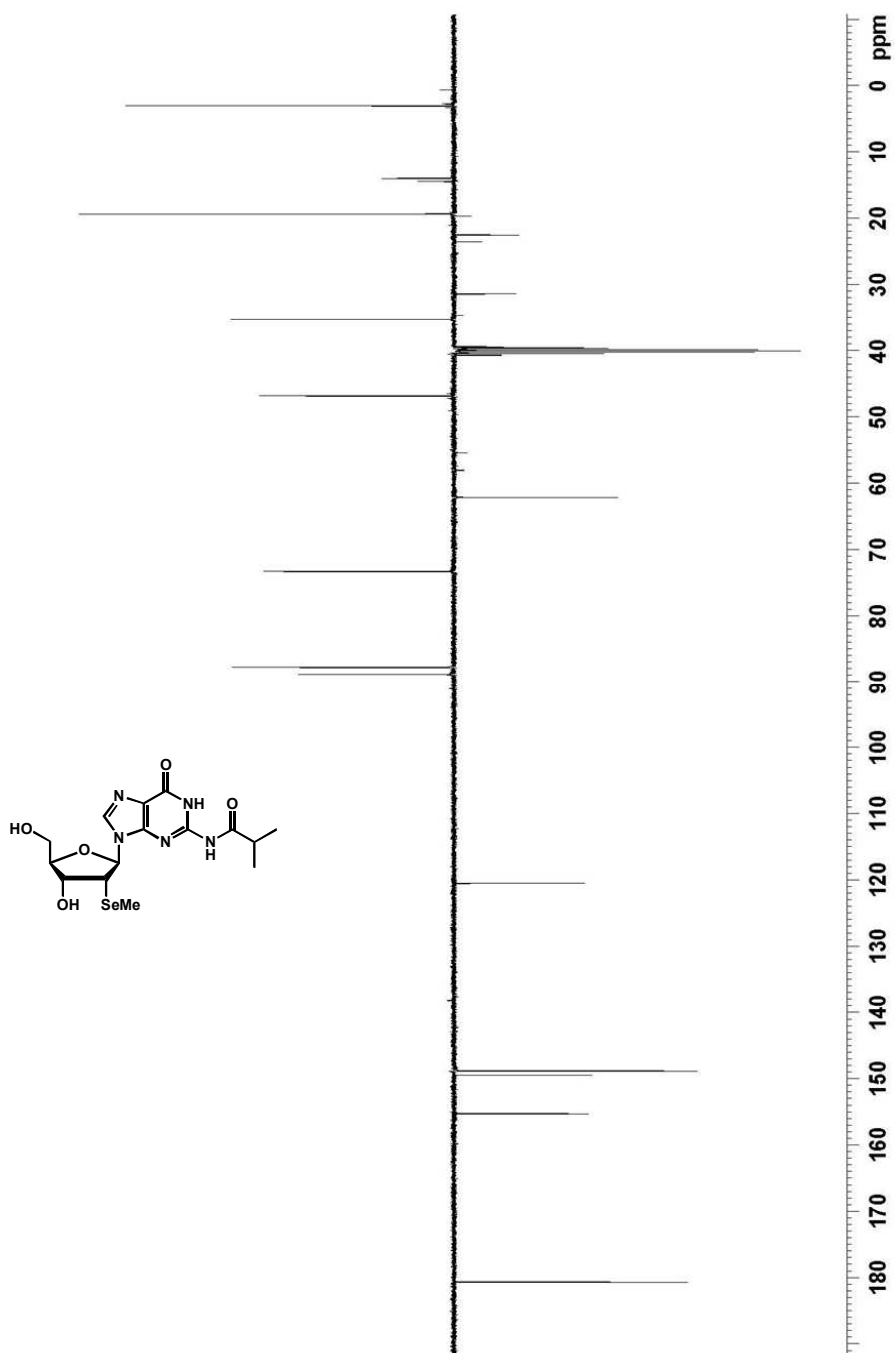

**Figure S9.**  $^{13}\text{C}$  NMR (APT) spectrum of compound **6** in  $\text{CDCl}_3$

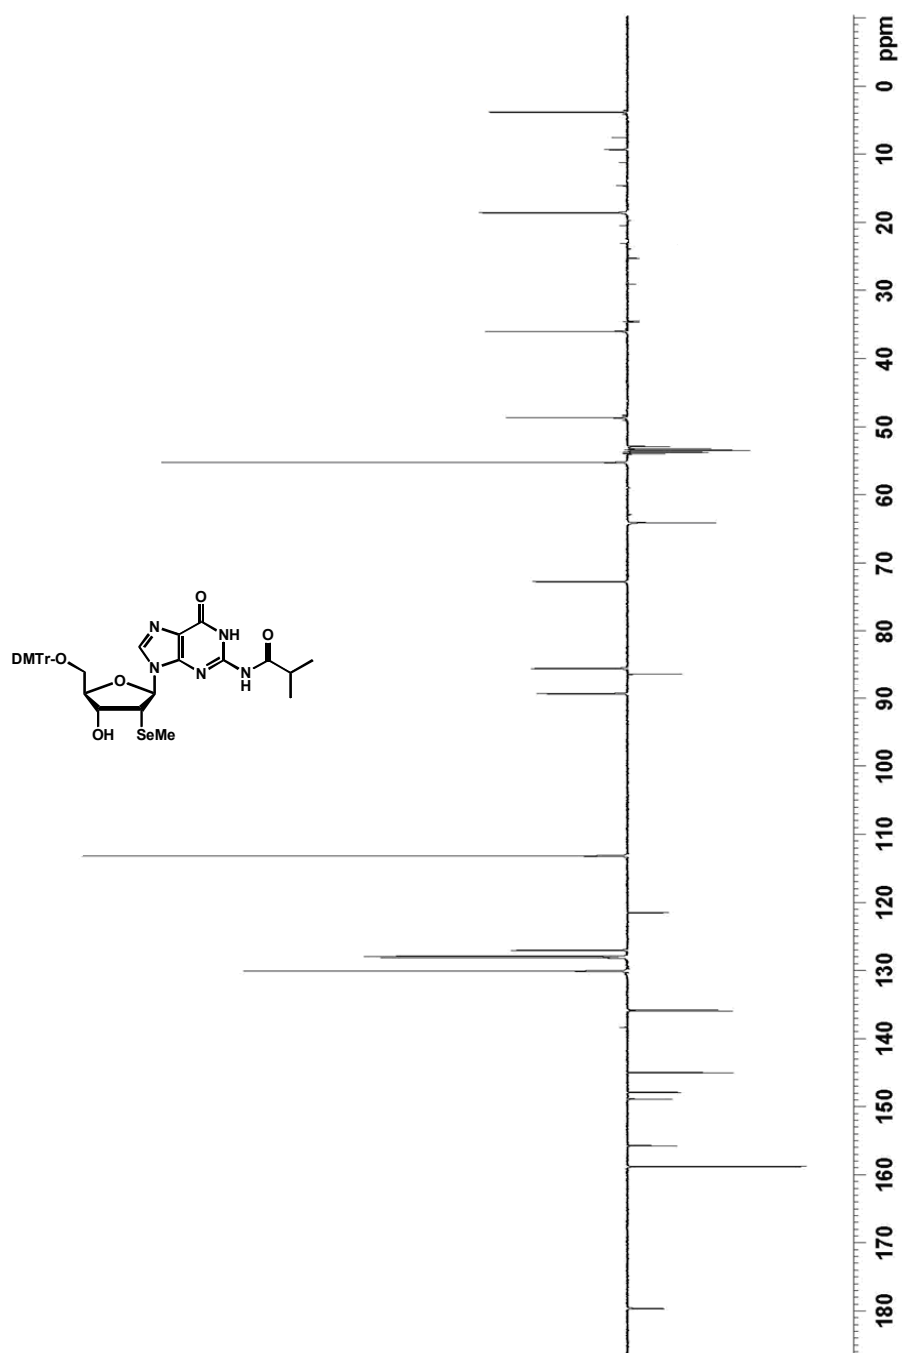

**Figure S10.**  $^{13}\text{C}$  NMR (APT) spectrum of compound **7** in  $\text{CDCl}_3$

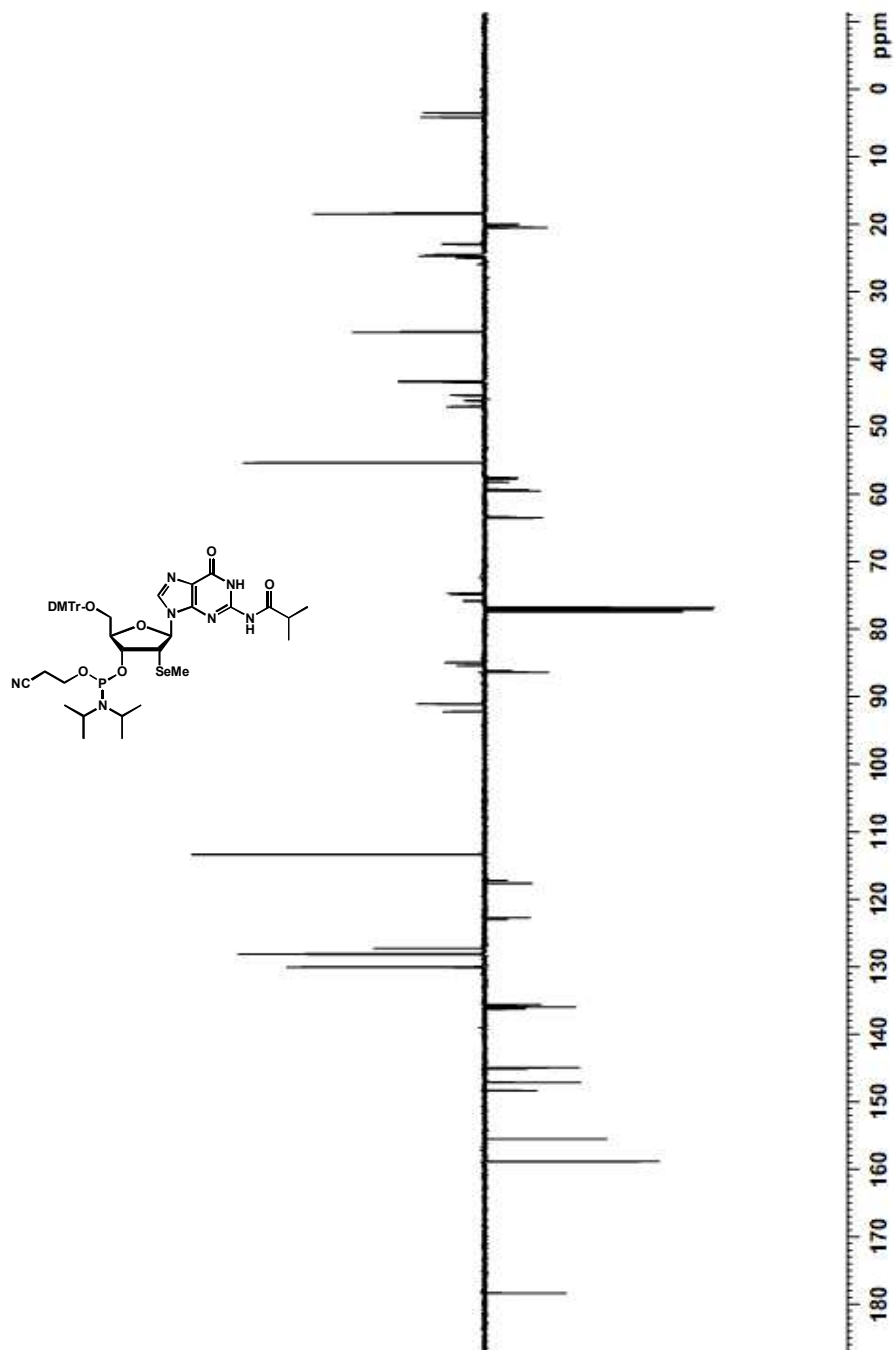

**Figure S11.**  $^{31}\text{P}$  NMR spectrum of compound **7** in  $\text{CDCl}_3$

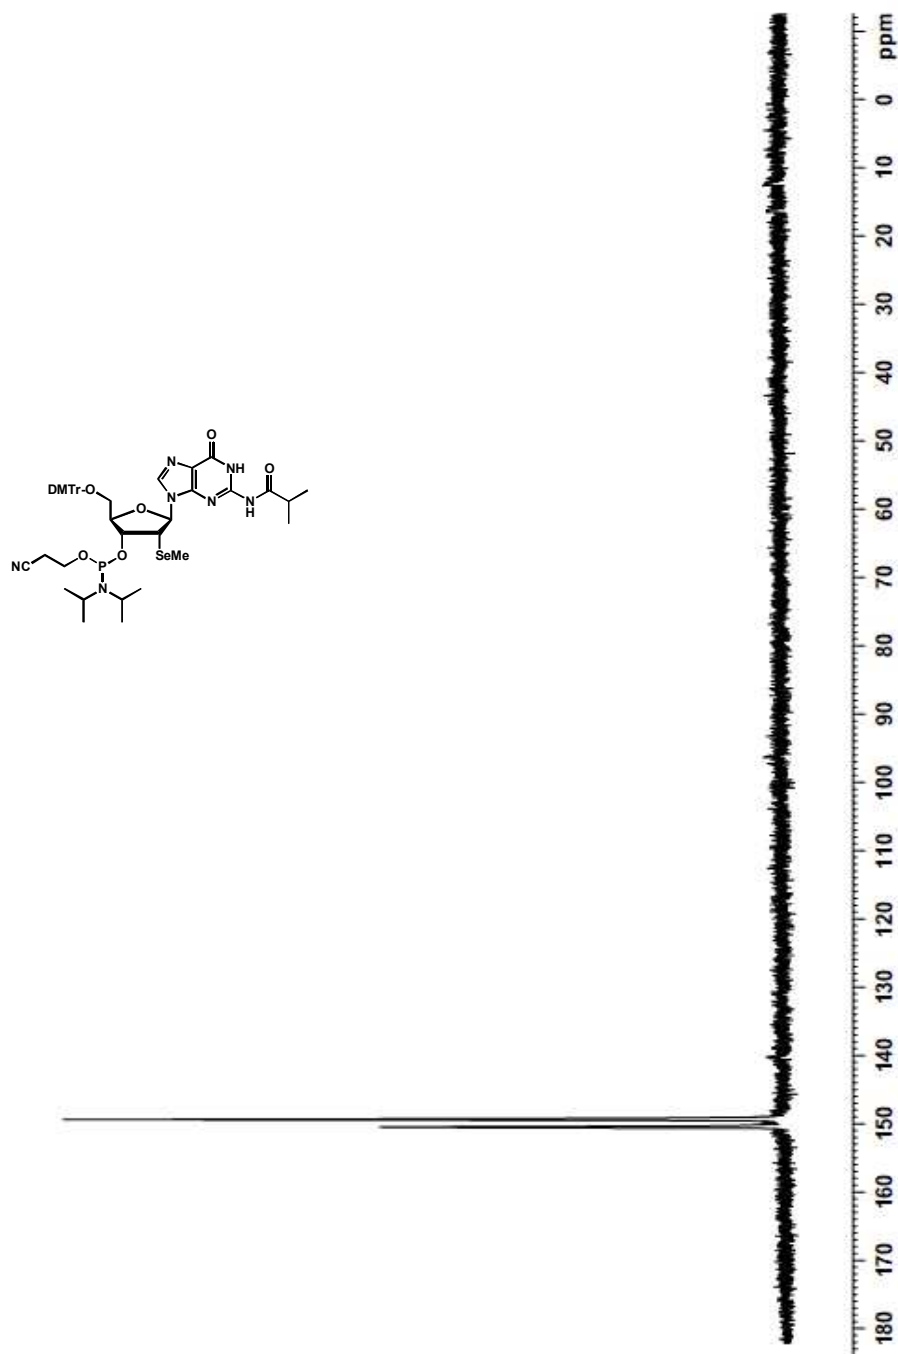

**Figure S12.** ESI-TOF high-acc spectrum of compound **4**, calcd for  $C_{27}H_{47}N_5O_6SeSi_2$   $[M + H]^+$  674.2303, found 674.2304,  $[M + Na]^+$  696.2122, found 696.2126.

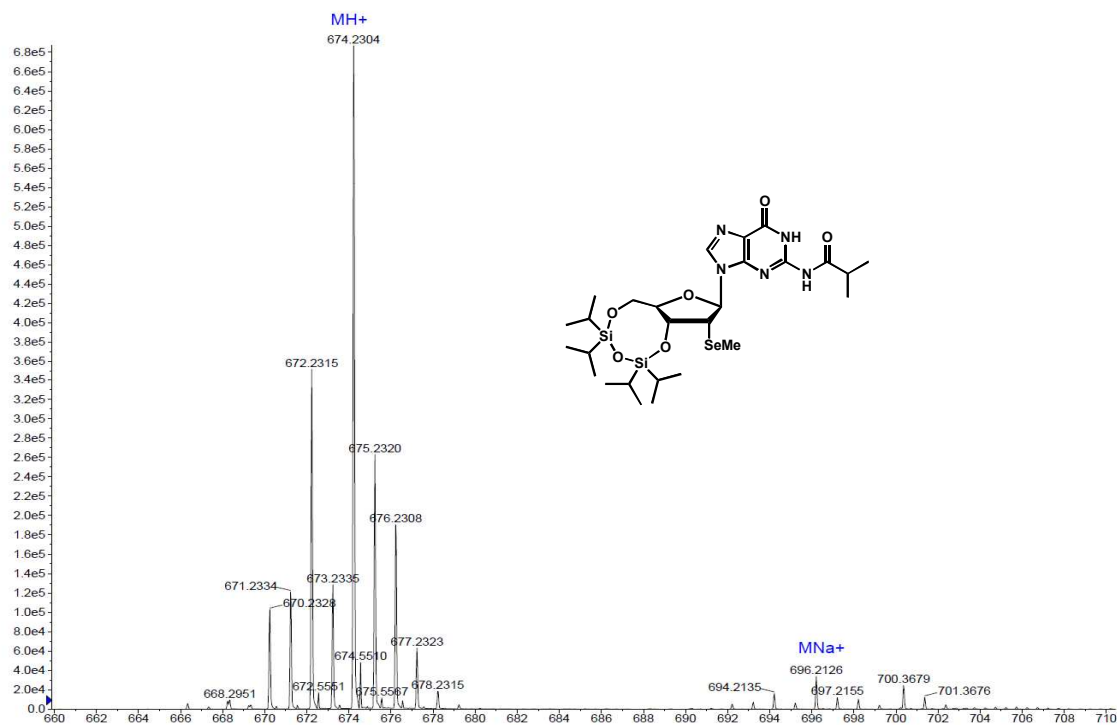

**Figure S13.** ESI-TOF high-acc spectrum of compound **5**, calcd for  $C_{15}H_{21}N_5O_5Se$   $[M + H]^+$  432.0781, found 432.0777;  $[M + Na]^+$  454.06, found 454.0601.

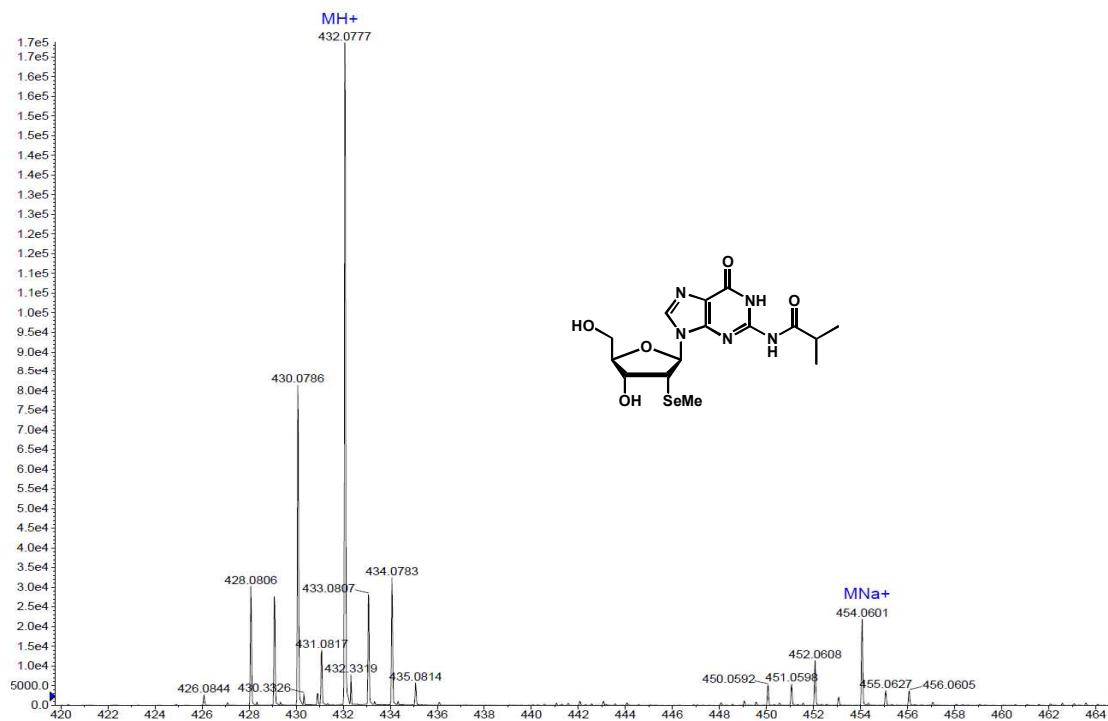

**Figure S14.** ESI-TOF high-acc spectrum of compound **6**, calcd for  $C_{36}H_{39}N_5O_7Se$   
 $[M + H]^+$  734.2087, found 734.2085;  $[M + Na]^+$  756.1907, found 756.1908.

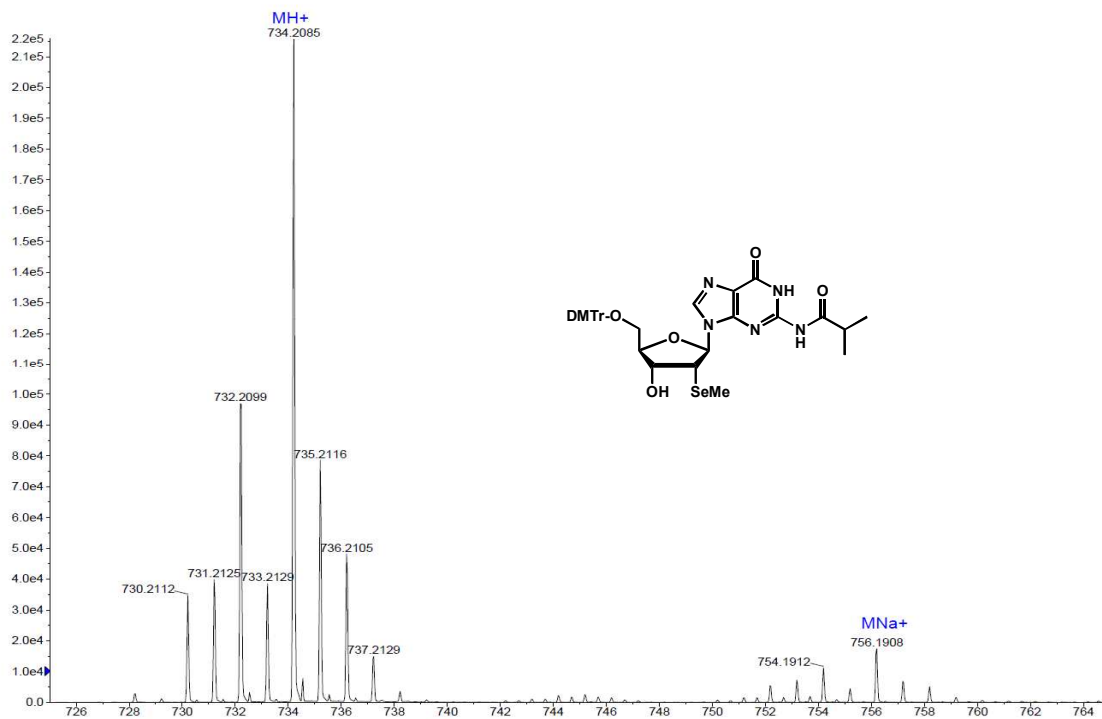

**Figure S15.** ESI-TOF high-acc spectrum of compound **7**, calcd for  $C_{45}H_{56}N_7O_8PSe$   
 $[M + H]^+$  934.3166, found 934.3170,  $[M + Na]^+$  956.2985, found 956.2983.

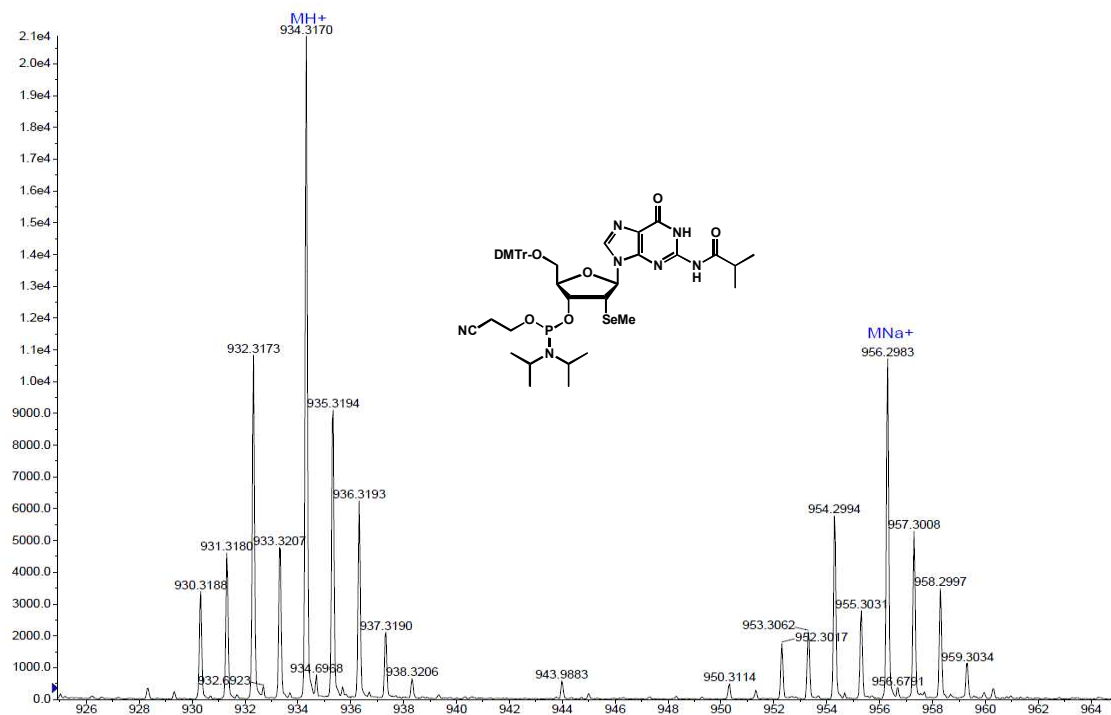



**Table S1.** Data collection and refinement statistics of the 2'-SeMe-modified DNA (dGTG<sub>Se</sub>TACAC)

| <b>Structure ID)</b>                                        | <b>(PDB</b> | <b>dGTG<sub>Se</sub>TACAC</b>            | <b>Structure ID)</b>             | <b>(PDB</b> | <b>dGTG<sub>Se</sub>TACAC</b> |
|-------------------------------------------------------------|-------------|------------------------------------------|----------------------------------|-------------|-------------------------------|
|                                                             |             | <b>(3IFI)</b>                            |                                  |             | <b>(3IFI)</b>                 |
| <b>Data collection</b>                                      |             |                                          | <b>Refinement</b>                |             |                               |
| Space Group                                                 |             | P4 <sub>3</sub> 2 <sub>1</sub> 2         | Resolution range, Å (last shell) |             | 29.5– 1.20                    |
| Cell dimensions: <i>a, b, c</i> (Å),<br><i>α, β, γ</i> (°C) |             | 41.641, 41.641,<br>24.112,<br>90, 90, 90 | R <sub>work</sub> , %            |             | 20.2                          |
| Resolution range, Å (last shell)                            |             | 50.0 – 1.20                              | R <sub>free</sub> , %            |             | 22.1                          |
| Unique reflections                                          |             | 6376 (160)                               | Number of reflections            |             | 5901                          |
| Completeness, %                                             |             | 90.2 (63.9)                              | <b>Number of atoms</b>           |             |                               |
| R <sub>merge</sub> , %                                      |             | 6.5 (31.9)                               | Nucleic Acid (single)            |             | 210                           |
| I/σ(I)                                                      |             | 52.8 (4.2)                               | Heavy Atoms and Ion              |             | 1 Se                          |
| Redundancy                                                  |             | 13.0 (3.2)                               | Water                            |             | 24                            |
| <b>R.m.s. deviations</b>                                    |             |                                          |                                  |             |                               |
| Bond length, Å                                              |             | 0.004                                    |                                  |             |                               |
| Bond angle                                                  |             | 1.144                                    |                                  |             |                               |

$$R_{\text{merge}} = \sum |I - \langle I \rangle| / \sum I$$
